# Supplementary material for: Copper is an intestinal habitat filter affecting the gut microbiota interactions with Salmonella Typhimurium
Source: Microbiome. 2026 Mar 28;14:110. doi: 10.1186/s40168-025-02322-4 (PMC13064011; doi:10.1186/s40168-025-02322-4)
Supplement: Supplementary file 6 — Supplementary Material 5. Table S2 [file 40168_2025_2322_MOESM5_ESM.xlsx]

## Sheet: Sheet 1
classification_GTDB	Genus_GTDB	Species_GTDB	Faeces/GIT	Animal	Comments	Proof	microbeatlas
d__Bacteria;p__Bacillota;c__Bacilli;o__Paenibacillales;f__Paenibacillaceae;g__Paenibacillus_A;s__Paenibacillus_A barengoltzii	Paenibacillus_A	Paenibacillus_A barengoltzii	Yes	mouse	Isolated from mouse caecum	https://www.ncbi.nlm.nih.gov/biosample/?term=SAMN01730996	https://microbeatlas.org/index.html?action=taxon&taxon_id=90_15358;96_2906;97_3575;98_4527;99_6104&stattab=map
d__Bacteria;p__Bacillota;c__Bacilli;o__Bacillales;f__DSM-18226;g__Niallia;s__Niallia sp001076885	Niallia	Niallia sp001076885	Yes	mouse, pig, cow	Isolated from mouse feces. MAG in cow rumen, pig feces	https://www.ncbi.nlm.nih.gov/biosample/?term=SAMEA8801461; https://www.ncbi.nlm.nih.gov/biosample/?term=SAMN02841167; https://www.ncbi.nlm.nih.gov/biosample/?term=SAMN15872554
d__Bacteria;p__Bacillota;c__Bacilli;o__Lactobacillales;f__Aerococcaceae;g__Fundicoccus;s__	Fundicoccus		?		Fundicoccus ignavus isolated from milk
d__Bacteria;p__Bacillota;c__Bacilli;o__Lactobacillales;f__Aerococcaceae;g__GCA-024661895;s__	GCA-024661895		?		Fundicoccus ignavus isolated from milk
d__Bacteria;p__Pseudomonadota;c__Gammaproteobacteria;o__Enterobacterales;f__Enterobacteriaceae;g__Escherichia;s__Escherichia albertii	Escherichia	Escherichia albertii	Yes	pig	Can be isolated from pig feces	https://www.ncbi.nlm.nih.gov/pmc/articles/PMC3309589/
d__Bacteria;p__Bacillota_A;c__Clostridia;o__Oscillospirales;f__Oscillospiraceae;g__Pseudoflavonifractor_A;s__Pseudoflavonifractor_A sp022772585	Pseudoflavonifractor_A	Pseudoflavonifractor_A sp022772585	Yes	pig	MAG from pig feces reported previously	https://www.ncbi.nlm.nih.gov/biosample/?term=SAMN26525702
d__Bacteria;p__Bacillota_A;c__Clostridia;o__Clostridiales;f__Clostridiaceae;g__Clostridium;s__Clostridium sp012519155	Clostridium	Clostridium sp012519155	?
d__Bacteria;p__Bacillota_A;c__Clostridia;o__Clostridiales;f__Clostridiaceae;g__Clostridium_J;s__Clostridium_J sulfidigenes	Clostridium_J	Clostridium_J sulfidigenes	No	pig	Found in pigs with microbesatlas		https://microbeatlas.org/index.html?action=taxon&taxon_id=90_34;96_614;97_717;98_836;99_1064
d__Bacteria;p__Bacillota;c__Bacilli;o__Paenibacillales;f__Paenibacillaceae;g__Paenibacillus;s__Paenibacillus polymyxa	Paenibacillus	Paenibacillus polymyxa	No	pig	Found in pigs with microbesatlas		https://microbeatlas.org/index.html?action=taxon&taxon_id=90_15358;96_258;97_282;98_314;99_373
d__Bacteria;p__Bacillota_A;c__Clostridia;o__Oscillospirales;f__Oscillospiraceae;g__Lawsonibacter;s__Lawsonibacter sp944385035	Lawsonibacter	Lawsonibacter sp944385035	Yes	chicken	MAG from chicken cecal content	https://www.ncbi.nlm.nih.gov/biosample/?term=SAMEA110135775
d__Bacteria;p__Bacillota_A;c__Clostridia;o__Oscillospirales;f__Butyricicoccaceae;g__Agathobaculum;s__Agathobaculum pullicola	Agathobaculum	Agathobaculum pullicola	Yes	chicken	MAG from chicken cecal content	https://www.ncbi.nlm.nih.gov/biosample/?term=SAMN15816725
d__Bacteria;p__Bacillota_A;c__Clostridia;o__Oscillospirales;f__Butyricicoccaceae;g__Agathobaculum;s__	Agathobaculum		?
d__Bacteria;p__Bacillota_A;c__Clostridia;o__Clostridiales;f__Clostridiaceae;g__Clostridium_F;s__Clostridium_F sp001276215	Clostridium_F	Clostridium_F sp001276215	Yes	insect	isolated from insect gut, similar to sporogenes	https://www.ncbi.nlm.nih.gov/biosample/?term=SAMN03107535
d__Bacteria;p__Bacillota_A;c__Clostridia;o__Oscillospirales;f__Oscillospiraceae;g__Avoscillospira_A;s__	Avoscillospira_A		?
d__Bacteria;p__Bacillota_A;c__Clostridia;o__Clostridiales;f__Clostridiaceae;g__Clostridium_F;s__Clostridium_F sporogenes	Clostridium_F	Clostridium_F sporogenes	Yes	pig	isolated from pig gut	https://www.ncbi.nlm.nih.gov/pmc/articles/PMC10146858/
d__Bacteria;p__Bacillota;c__Bacilli;o__Bacillales;f__Bacillaceae_G;g__Bacillus_A;s__Bacillus_A bombysepticus	Bacillus_A	Bacillus_A bombysepticus	No		in the species cluster with Bacillus cereus
d__Bacteria;p__Bacillota;c__Bacilli;o__Bacillales;f__Bacillaceae_G;g__Bacillus_A;s__Bacillus_A wiedmannii	Bacillus_A	Bacillus_A wiedmannii	No	pig	Found in pigs with microbesatlas		https://microbeatlas.org/index.html?action=taxon&taxon_id=90_3;96_21;97_22;98_25
d__Bacteria;p__Bacillota_A;c__Clostridia;o__Lachnospirales;f__Lachnospiraceae;g__;s__			?
d__Bacteria;p__Bacillota_A;c__Clostridia;o__Tissierellales;f__Tissierellaceae_A;g__CABMKH01;s__	CABMKH01		?
d__Bacteria;p__Bacillota;c__Bacilli;o__Bacillales_D;f__Amphibacillaceae;g__Gracilibacillus;s__	Gracilibacillus		?
d__Bacteria;p__Bacillota_A;c__Clostridia;o__Lachnospirales;f__Lachnospiraceae;g__Paralachnospira;s__Paralachnospira sp934351765	Paralachnospira	Paralachnospira sp934351765	?
d__Bacteria;p__Bacillota;c__Bacilli;o__Bacillales;f__Bacillaceae;g__Bacillus;s__Bacillus licheniformis	Bacillus	Bacillus licheniformis	Yes	pig	isolated from pig gut	https://www.ncbi.nlm.nih.gov/pmc/articles/PMC10146858/
d__Bacteria;p__Actinomycetota;c__Actinomycetia;o__Propionibacteriales;f__Propionibacteriaceae;g__Luteococcus;s__	Luteococcus		?
d__Bacteria;p__Bacillota_A;c__Clostridia;o__Tissierellales;f__Peptoniphilaceae;g__Gallicola;s__Gallicola sp012798975	Gallicola	Gallicola sp012798975	Yes	chicken	MAG from chicken gut	https://www.ncbi.nlm.nih.gov/biosample/?term=SAMN17039836
