# Supplementary material for: Copper is an intestinal habitat filter affecting the gut microbiota interactions with Salmonella Typhimurium
Source: Microbiome. 2026 Mar 28;14:110. doi: 10.1186/s40168-025-02322-4 (PMC13064011; doi:10.1186/s40168-025-02322-4)
Supplement: Supplementary file 7 — Supplementary Material 6. Table S3 [file 40168_2025_2322_MOESM6_ESM.xlsx]

## Sheet: Sheet1
Strain	Silpco	variant/phylogroup
HCP4S3_I4	yes	sil7_pco6
HCP5S3_I1	no	albertii
HCP5S3_I2	yes	sil4_pco3
HCP5S3_I4	yes	sil8_pco7
HCP6S3_I1	yes	sil9_pcoNA
HCP6S3_I2	yes	sil10_pco1
HCP6S3_I4	no	F
HCP8S3_I1	yes	sil2_pco2
HCP8S3_I5	no	D
LCP10S3_I1	no	C
HCP17S3_I3	no	B1
HCP17S3_I4	yes	sil5_pco4
HCP22S3_I4	no	A
LCP17S3_I1	yes	sil11_pco8
LCP22S3_I2	yes	sil3_pcoNA
LCP29S3_I5	no	G
LCP30S3_I3	yes	sil1_pco1
LCP30S3_I5	yes	sil4_pco9
HCP20S3_I1	no	E
HCP30S3_I2	yes	sil4_pcoNA
